# Supplementary material
Source: publisher site journal article supplement (https://www.dovepress.com/get_supplementary_file.php?f=352849.docx)
Supplement: Supplementary file 1 [file get_supplementary_file.php]

Supplementary table 1. Dose accuracy test: comparison between G33x4 and G29x12 needles using a liquid with 1 cPoise of viscosity

| Needle | Volume* | S | Ssd | k | UL [g] | LL [g] | S+(k*Ssd) | S-(k*Ssd) | **S+(k*Ssd)≤UL** | **S-(k*Ssd)≥LL** |
| --- | --- | --- | --- | --- | --- | --- | --- | --- | --- | --- |
| G33x4 | Vlow | 0.061 | 0.0021 | 2.67 | 0.070 | 0.050 | 0.067 | 0.056 | Compliant | Compliant |
| G33x4 | Vhigh | 0.542 | 0.0039 | 2.67 | 0.567 | 0.513 | 0.553 | 0.532 | Compliant | Compliant |
| G29x12 | Vlow | 0.061 | 0.0013 | 2.67 | 0.070 | 0.050 | 0.064 | 0.058 | Compliant | Compliant |
| G29x12 | Vhigh | 0.544 | 0.0038 | 2.67 | 0.567 | 0.513 | 0.554 | 0.533 | Compliant | Compliant |

*Acceptance criteria for Humapen Luxura, Eli Lilly: Vlow = 0.060 ml (0.050-0.070); Vhigh = 0.54 ml (0.513-0.567)

Supplementary table 2. Dose accuracy test of G33x4 needle using a glycerol solution with 10 cPoise of viscosity

| Needle | Volume* | S | Ssd | k | UL [g] | LL [g] | S+(k*Ssd) | S-(k*Ssd) | **S+(k*Ssd)≤UL** | **S-(k*Ssd)≥LL** |
| --- | --- | --- | --- | --- | --- | --- | --- | --- | --- | --- |
| G33x4 | Vlow | 0.060 | 0.0024 | 2.67 | 0.070 | 0.050 | 0.066 | 0.053 | Compliant | Compliant |
| G33x4 | Vhigh | 0.531 | 0.0043 | 2.67 | 0.567 | 0.513 | 0.542 | 0.519 | Compliant | Compliant |

*Acceptance criteria for Humapen Luxura, Eli Lilly: Vlow = 0.060 ml (0.050-0.070); Vhigh = 0.54 ml (0.513-0.567)

Supplementary table 3. Dose accuracy test: comparison between G33x4 and G34x3.5 needles using insulin

| Needle | Volume* | S | Ssd | k | UL [g] | LL [g] | S+(k*Ssd) | S-(k*Ssd) | **S+(k*Ssd)≤UL** | **S-(k*Ssd)≥LL** |
| --- | --- | --- | --- | --- | --- | --- | --- | --- | --- | --- |
| G33x4 | Vlow | 0.080 | 0.0015 | 2.67 | 0.090 | 0.070 | 0.084 | 0.076 | Compliant | Compliant |
| G33x4 | Vhigh | 0.710 | 0.0016 | 2.67 | 0.756 | 0.684 | 0.715 | 0.706 | Compliant | Compliant |
| G34x3.5 | Vlow | 0.078 | 0.0009 | 2.67 | 0.090 | 0.070 | 0.080 | 0.076 | Compliant | Compliant |
| G34x3.5 | Vhigh | 0.694 | 0.0028 | 2.67 | 0.756 | 0.684 | 0.702 | 0.687 | Compliant | Compliant |

*Acceptance criteria for Sanofi Lantus SoloStar: Vlow = 0.080 ml (0.070-0.090); Vhigh = 0.72 ml (0.684-0.756)
